# Supplementary material
Source: publisher site journal article supplement (https://www.dovepress.com/get_supplementary_file.php?f=494487.docx)
Supplement: Supplementary file 1 [file get_supplementary_file.php]

**Supplementary Material**

**Association of Uric Acid, High-Sensitivity C-Reactive Protein, and 90-Day Risk of Poor Function Outcome in Patients With Ischemic Stroke or Transient Ischemic Attacks**

**Supplementary Figure S1: Association of each biomarker with poor functional outcome by multivariate logistic regression with restricted cubic spline (RCS).**

**Supplementary Figure S2: Subgroup analysis for association of uric acid (UA) with poor functional outcome in patients with high levels of high-sensitivity c-reactive protein (hs-CRP).**

**Supplementary Figure S3: Standard mean differences plot for selected variables in the propensity score matching analysis.**

**Supplementary Table S1: Comparison of the Variables Before and After PSM for Low Uric Acid & High hsCRP Subgroup and High Uric Acid & High hsCRP Subgroup.**

**Supplementary Table S2: Spearman Correlation Coefficient Between Inflammatory Biomarkers.**


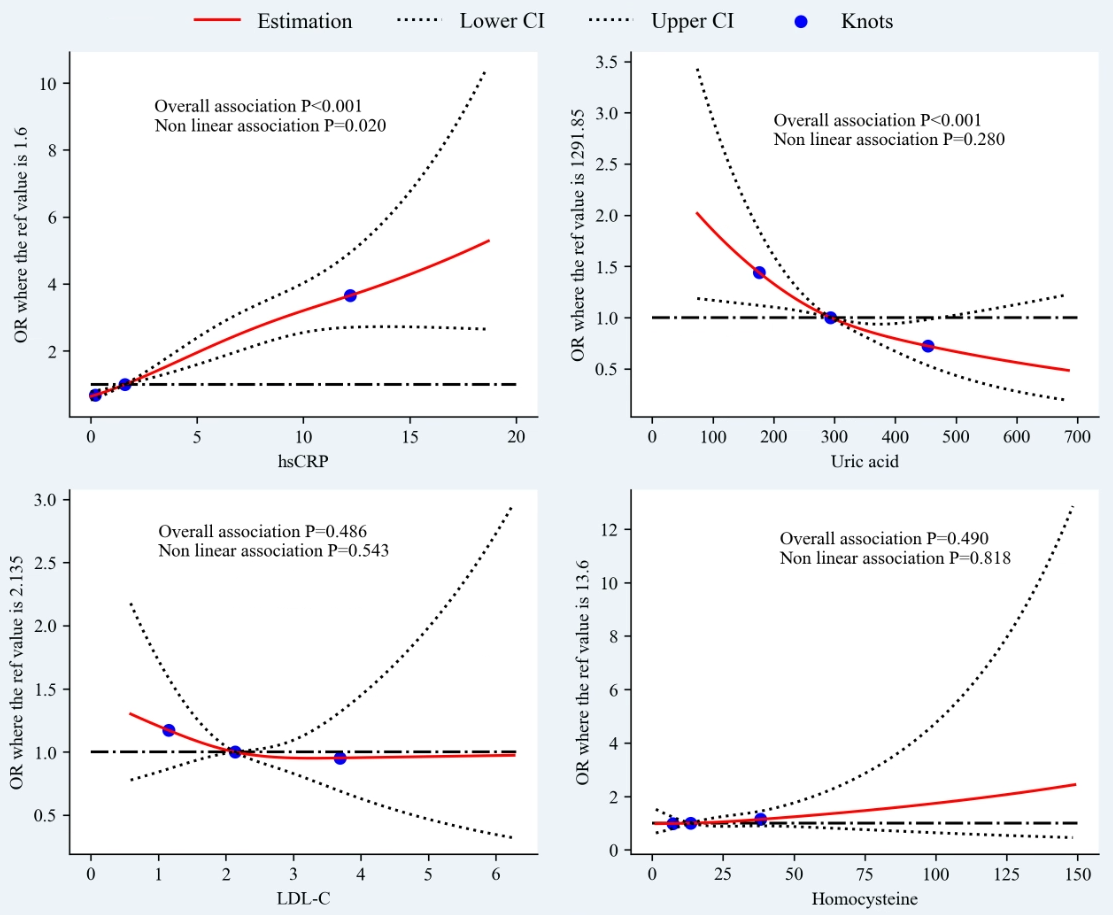


**Supplementary Figure S1: Association of each biomarker with poor functional outcome by multivariate logistic regression with restricted cubic spline (RCS).**

OR indicates odds ratio; hsCRP, high-sensitivity C-reactive protein; LDL-C, low density lipoprotein cholesterol.

TheRCS was fitted to explore a dose-response relationship between a single biomarker and poor functional outcome. The knots were set at 5th, 50th, and 90th percentiles and the reference values (OR=1) were set at the median of each metal concentrations. The red line indicates adjusted OR, and the dashed lines indicate 95%CI. The dose-response relationship was considered to be nonlinear if “Non-linear association *P*<0.05”.

**
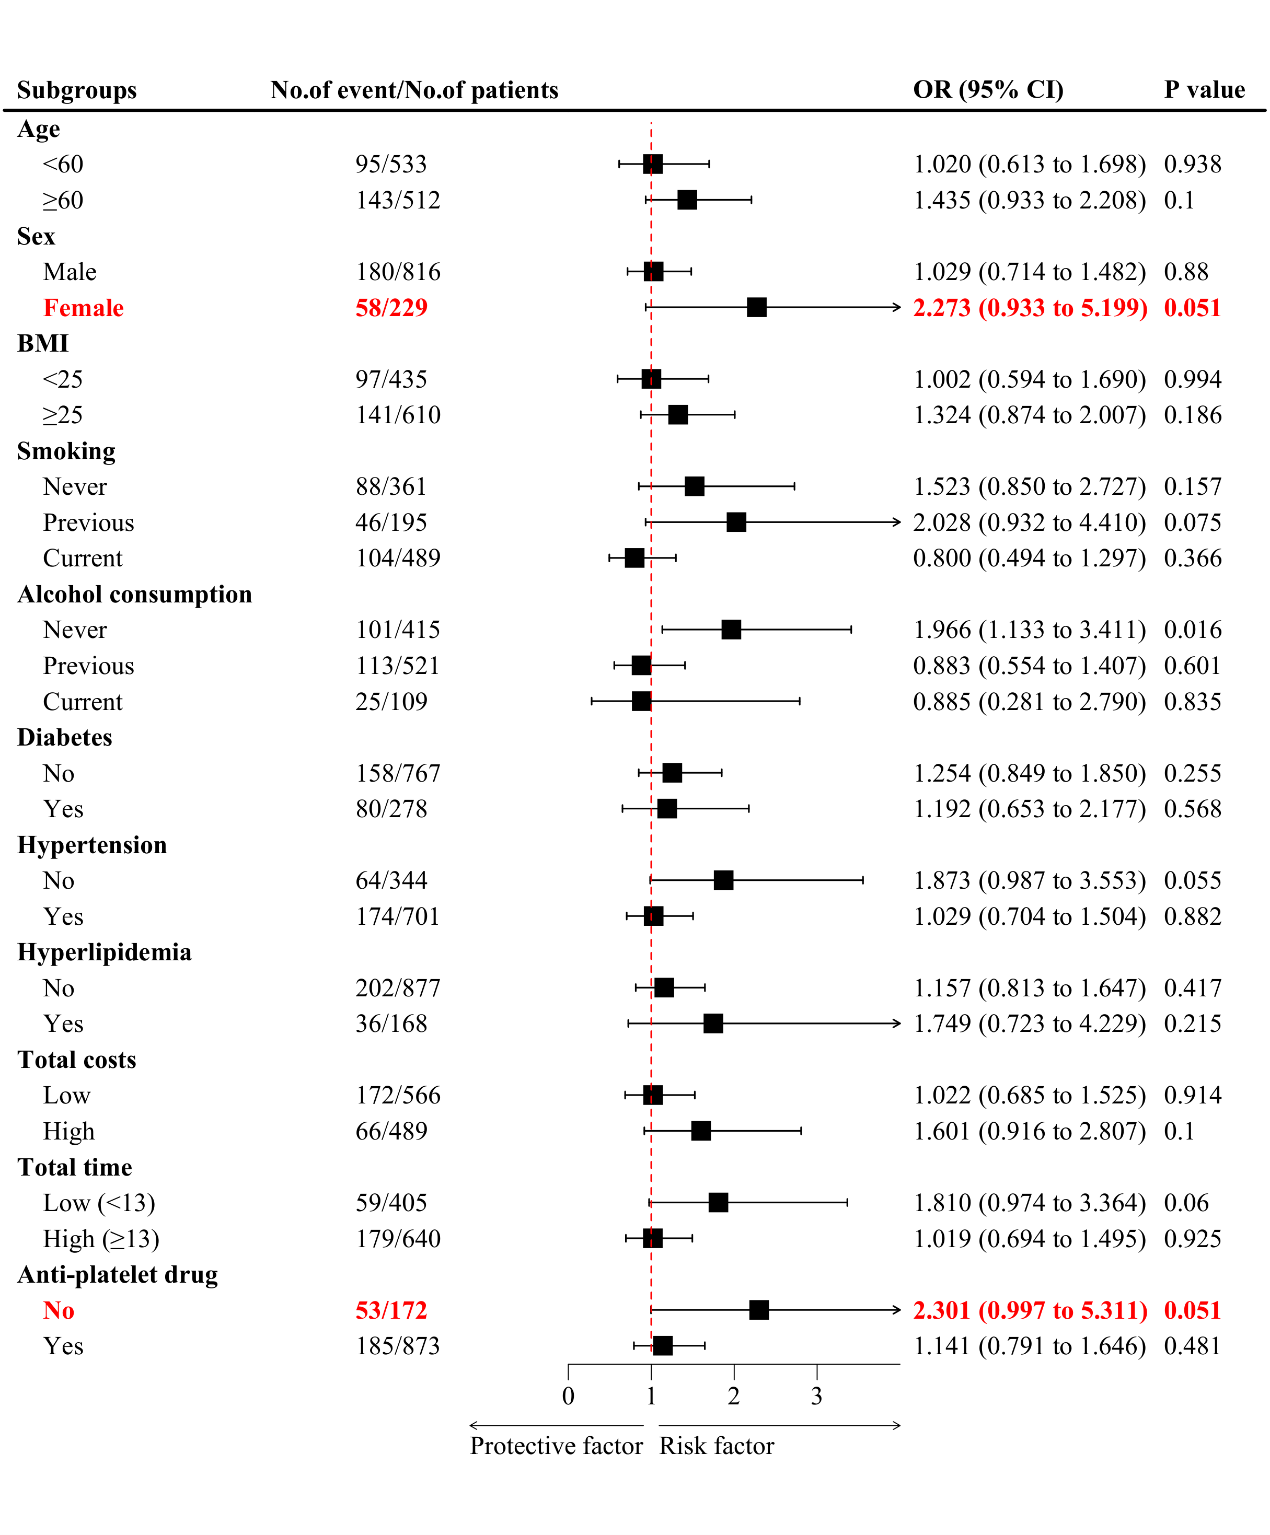
**

**Supplementary Figure S2: Subgroup analysis for association of uric acid (UA) with poor functional outcome in patients with high levels of high-sensitivity c-reactive protein (hs-CRP).**

OR indicates odds ratio; BMI, body mass index. Adjusted OR (95% CI) was calculated after adjusting for age, BMI, smoking, alcohol consumption, diabetes, hypertension, hyperlipidemia, total costs, total time and anti-platelet drug. BMI indicates body mass index, hsCRP, high-sensitivity C-reactive protein; LDL-C, low density lipoprotein cholesterol.


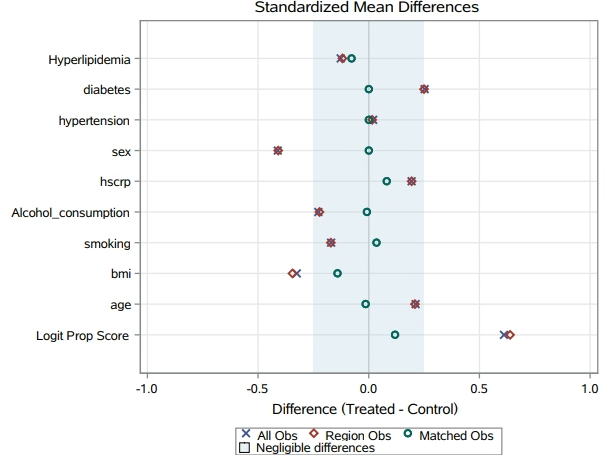


**Supplementary Figure S3: Standard mean differences plot for selected variables in the propensity score matching analysis.**

BMI indicates body mass index; hsCRP, high-sensitivity c-reactive protein; Logit Prob Score, the logit of the propensity score (used to compute differences between pairs of observations). The plot showed that the matched observations were within the recommended limits of -0.25 and 0.25, which were indicated by the shade area.

| **Supplementary Table S1: Comparison of the Variables Before and After PSM for Low Uric Acid & High hsCRP Subgroup and High Uric Acid & High hsCRP Subgroup.** | | | | | | |
| --- | --- | --- | --- | --- | --- | --- |
|  | **Before PSM** | |  | **After PSM** | |  |
| **Variables** | **Low uric acid & high hsCRP subgroup** | **High uric acid & high hsCRP subgroup** | ***P* value** | **Low uric acid & high hsCRP subgroup** | **High uric acid & high hsCRP subgroup** | ***P* value** |
| **N** | 542 | 503 |  | 387 | 387 |  |
| **Age** |  |  | 0.001 |  |  | 0.867 |
| Median(IOR) | 60(53,67) | 58(49,66) |  | 59(52,68) | 60(52,66) |  |
| **Sex, n (%)** |  |  | <0.001 |  |  | 1.000 |
| Male | 380(70.1%) | 436(86.7%) |  | 324(83.7%) | 324(83.7%) |  |
| Female | 162(29.9%) | 67(13.3%) |  | 63(16.3%) | 63(16.3%) |  |
| **BMI** |  |  | <0.001 |  |  | 0.021 |
| Median(IOR) | 24.9(22.9,27.3) | 26.1(24.2,28.7) |  | 25.8(23.9,27.5) | 24.9(23.4,27.2) |  |
| **Smoking, n (%)** |  |  | <0.05 |  |  | 0.864 |
| Previous 4 | 98(18.1%) | 97(19.3%) |  | 75(19.4%) | 81(20.9%) |  |
| Never 1 | 211(45.6%) | 150(29.8%) |  | 122(31.5%) | 119(30.7%) |  |
| Current 3 | 233(43.0%) | 256(50.9%) |  | 190(49.1%) | 187(48.3%) |  |
| **Alcohol consumption, n (%)** |  |  | <0.001 |  |  | 0.972 |
| Previous | 55(10.1%) | 54(10.7%) |  | 44(11.4%) | 42(10.9%) |  |
| Never | 247(45.6%) | 168(33.4%) |  | 136(35.1%) | 136(35.1%) |  |
| Current | 240(44.3%) | 281(55.9%) |  | 207(53.5%) | 209(54.0%) |  |
| **Hypertension, n (%)** |  |  | 0.745 |  |  | 1.000 |
| Yes | 366(67.5%) | 335 (66.6%) |  | 269(69.5%) | 269 (69.5%) |  |
| No | 176(32.5%) | 168(33.4%) |  | 118(30.5%) | 118(30.5%) |  |
| **Diabetes, n (%)** |  |  | <0.001 |  |  | 1.000 |
| Yes | 173(31.9%) | 105(20.9%) |  | 93(24.0%) | 93(24.0%) |  |
| No | 369(68.1%) | 398(79.1%) |  | 294(76.0%) | 294(76.0%) |  |
| **Hyperlipidemia, n (%)** |  |  | 0.041 |  |  | 0.256 |
| Yes | 75(13.8%) | 93(18.5%) |  | 60(15.5%) | 49(12.7%) |  |
| No | 467(86.2%) | 410(81.5%) |  | 327(84.5%) | 338(87.3%) |  |
| **hsCRP** |  |  | 0.001 |  |  | 0.158 |
| Median(IOR) | 4.8(2.7,10.8) | 4.3(2.4,8.7) |  | 4.5(2.6,9.7) | 4.5(27,108) |  |
| BMI indicates body mass index; hsCRP, high-sensitivity c-reactive protein; PSM, propensity score matching; IQR, interquartile range | | | | | | |

| **Supplementary Table S2: Spearman Correlation Coefficient Between Inflammatory Biomarkers** | | |
| --- | --- | --- |
| Inflammatory biomarker | LDL-C | Cys |
| hsCRP | 0.102 | 0.062 |
|  | *P*<0.001 | *P*=0.004 |
| LDL-C |  | 0.103 |
|  |  | *P*<0.001 |
| hsCRP indicates high-sensitivity c-reactive protein, LDL-C, low-density lipoprotein cholesterol; Cys, homocysteine | | |
